# Supplementary material for: Extensive Genome-Wide Variability of Human Cytomegalovirus in Congenitally Infected Infants
Source: PubMed Central journal article supplement (PMC3098220; doi:10.1371/journal.ppat.1001344), 2011-05-19
Supplement: ppat.1001344.s012.pdf [file ppat.1001344.s012.pdf]

Table S3: Whole genome intrahost diversity data from clinical samples

| Feature | Feature |          |                 |        | U01            |                |       |                      |                |                      | U04            |                |       |                      |                |                      | U33            |                |       |                      |                |                      | Averages       |                |       |                      |                |                      |
|---------|---------|----------|-----------------|--------|----------------|----------------|-------|----------------------|----------------|----------------------|----------------|----------------|-------|----------------------|----------------|----------------------|----------------|----------------|-------|----------------------|----------------|----------------------|----------------|----------------|-------|----------------------|----------------|----------------------|
|         | Type    | Kinetics | Function        | Length | Variable Sites | Total Variants | Depth | Nucleotide Diversity | Mean Diversity | Amino Acid Diversity | Variable Sites | Total Variants | Depth | Nucleotide Diversity | Mean Diversity | Amino Acid Diversity | Variable Sites | Total Variants | Depth | Nucleotide Diversity | Mean Diversity | Amino Acid Diversity | Variable Sites | Total Variants | Depth | Nucleotide Diversity | Mean Diversity | Amino Acid Diversity |
| RL1     | gene    | unk      | Regulatory      | 933    | 12             | 302            | 151   | 0.15%                | 0.18%          | 0.11%                | 55             | 1251           | 367   | 0.28%                | 0.34%          | 0.18%                | 26             | 923            | 921   | 0.10%                | 0.11%          | 0.07%                | 31             | 825            | 480   | 0.18%                | 0.21%          | 0.12%                |
| RL5A    | gene    | E        | Unknown         | 288    | 1              | 3              | 69    | 0.01%                | 0.01%          | 0.00%                | 0              | 0              | 79    | 0.00%                | 0.00%          | 0.00%                | 1              | 3              | 69    | 0.02%                | 0.02%          | 0.02%                | 1              | 2              | 72    | 0.01%                | 0.01%          | 0.01%                |
| RL6     | gene    | L        | Unknown         | 336    | 0              | 0              | 17    | 0.00%                | 0.00%          | 0.00%                | 0              | 0              | 35    | 0.00%                | 0.00%          | 0.00%                | 0              | 3              | 77    | 0.00%                | 0.00%          | 0.00%                | 0              | 4              | 43    | 0.00%                | 0.00%          | 0.00%                |
| RL10    | gene    | E-L      | Glycoprotein    | 513    | 6              | 35             | 123   | 0.05%                | 0.05%          | 0.04%                | 5              | 24             | 52    | 0.09%                | 0.11%          | 0.06%                | 13             | 46             | 88    | 0.10%                | 0.10%          | 0.08%                | 8              | 35             | 87    | 0.08%                | 0.09%          | 0.06%                |
| RL11    | gene    | L        | Glycoprotein    | 705    | 12             | 3564           | 891   | 0.26%                | 0.57%          | 0.23%                | 5              | 242            | 830   | 0.02%                | 0.02%          | 0.01%                | 14             | 340            | 393   | 0.10%                | 0.10%          | 0.09%                | 10             | 1382           | 705   | 0.13%                | 0.23%          | 0.11%                |
| RL12    | gene    | E-L      | Unknown         | 1245   | 1              | 3              | 48    | 0.01%                | 0.01%          | 0.00%                | 23             | 214            | 200   | 0.09%                | 0.08%          | 0.06%                | 0              | 0              | 84    | 0.00%                | 0.00%          | 0.00%                | 8              | 72             | 111   | 0.03%                | 0.03%          | 0.02%                |
| RL13    | gene    | E-L      | Unknown         | 882    | 2              | 9              | 30    | 0.03%                | 0.03%          | 0.01%                | 0              | 0              | 250   | 0.00%                | 0.00%          | 0.00%                | 0              | 0              | 72    | 0.00%                | 0.00%          | 0.00%                | 1              | 3              | 117   | 0.01%                | 0.01%          | 0.00%                |
| UL1     | gene    | E-L      | Envelope        | 657    | 0              | 0              | 14    | 0.00%                | 0.00%          | 0.00%                | 12             | 96             | 233   | 0.06%                | 0.06%          | 0.03%                | 3              | 349            | 2379  | 0.02%                | 0.02%          | 0.02%                | 5              | 148            | 875   | 0.03%                | 0.03%          | 0.02%                |
| UL2     | gene    | L        | Unknown         | 180    | 8              | 141            | 83    | 0.59%                | 0.94%          | 0.47%                | 1              | 21             | 909   | 0.01%                | 0.01%          | 0.00%                | 2              | 114            | 2627  | 0.02%                | 0.02%          | 0.01%                | 4              | 92             | 1206  | 0.21%                | 0.33%          | 0.16%                |
| UL4     | gene    | E        | Glycoprotein    | 450    | 15             | 153            | 51    | 0.53%                | 0.56%          | 0.39%                | 0              | 0              | 166   | 0.00%                | 0.00%          | 0.00%                | 5              | 658            | 1325  | 0.12%                | 0.11%          | 0.06%                | 7              | 270            | 514   | 0.22%                | 0.22%          | 0.15%                |
| UL5     | gene    | E        | Unknown         | 501    | 18             | 12078          | 10486 | 0.21%                | 0.23%          | 0.16%                | 11             | 498            | 1508  | 0.06%                | 0.07%          | 0.04%                | 9              | 797            | 2354  | 0.07%                | 0.07%          | 0.03%                | 13             | 4458           | 4783  | 0.11%                | 0.12%          | 0.08%                |
| UL6     | gene    | unk      | Unknown         | 843    | 8              | 347            | 1594  | 0.02%                | 0.03%          | 0.02%                | 20             | 222            | 351   | 0.07%                | 0.07%          | 0.05%                | 22             | 2766           | 3845  | 0.09%                | 0.09%          | 0.07%                | 17             | 1112           | 1930  | 0.06%                | 0.06%          | 0.05%                |
| UL7     | gene    | L        | Unknown         | 669    | 3              | 46             | 45    | 0.10%                | 0.15%          | 0.06%                | 4              | 27             | 295   | 0.01%                | 0.01%          | 0.01%                | 2              | 252            | 1828  | 0.02%                | 0.02%          | 0.01%                | 3              | 108            | 723   | 0.04%                | 0.06%          | 0.03%                |
| UL8     | gene    | unk      | Unknown         | 369    | 8              | 3169           | 8862  | 0.09%                | 0.10%          | 0.05%                | 13             | 2229           | 1371  | 0.38%                | 0.44%          | 0.25%                | 5              | 1235           | 1065  | 0.11%                | 0.20%          | 0.06%                | 9              | 2211           | 3766  | 0.19%                | 0.25%          | 0.12%                |
| UL9     | gene    | L        | Glycoprotein    | 702    | 0              | 0              | 98    | 0.00%                | 0.00%          | 0.00%                | 0              | 0              | 16    | 0.00%                | 0.00%          | 0.00%                | 1              | 3              | 85    | 0.01%                | 0.01%          | 0.01%                | 0              | 1              | 66    | 0.00%                | 0.00%          | 0.00%                |
| UL10    | gene    | unk      | Unknown         | 765    | 0              | 0              | 105   | 0.00%                | 0.00%          | 0.00%                | 8              | 28             | 112   | 0.03%                | 0.03%          | 0.01%                | 0              | 0              | 208   | 0.00%                | 0.00%          | 0.00%                | 3              | 9              | 142   | 0.01%                | 0.01%          | 0.00%                |
| UL11    | gene    | E        | Glycoprotein    | 819    | 18             | 517            | 538   | 0.10%                | 0.11%          | 0.06%                | 34             | 409            | 239   | 0.20%                | 0.19%          | 0.09%                | 27             | 1253           | 814   | 0.19%                | 0.19%          | 0.18%                | 26             | 726            | 530   | 0.16%                | 0.16%          | 0.11%                |
| UL13    | gene    | E        | Unknown         | 1422   | 116            | 64705          | 9725  | 0.39%                | 0.47%          | 0.26%                | 167            | 10319          | 1171  | 0.52%                | 0.62%          | 0.31%                | 101            | 17482          | 4157  | 0.31%                | 0.30%          | 0.21%                | 128            | 30835          | 5018  | 0.41%                | 0.46%          | 0.26%                |
| UL14    | gene    | L        | Unknown         | 984    | 74             | 2783           | 1217  | 0.29%                | 0.23%          | 0.26%                | 108            | 2166           | 545   | 0.51%                | 0.40%          | 0.31%                | 114            | 7350           | 2082  | 0.52%                | 0.36%          | 0.42%                | 99             | 4100           | 1281  | 0.44%                | 0.33%          | 0.33%                |
| UL15A   | gene    | L        | Unknown         | 309    | 37             | 3505           | 2197  | 0.49%                | 0.52%          | 0.36%                | 44             | 1669           | 867   | 0.64%                | 0.63%          | 0.36%                | 41             | 3628           | 2153  | 0.57%                | 0.55%          | 0.43%                | 41             | 2934           | 1739  | 0.57%                | 0.56%          | 0.38%                |
| UL16A   | gene    | E        | Glycoprotein    | 693    | 28             | 1247           | 784   | 0.21%                | 0.23%          | 0.18%                | 35             | 1285           | 622   | 0.28%                | 0.30%          | 0.18%                | 41             | 1974           | 832   | 0.32%                | 0.34%          | 0.28%                | 35             | 1502           | 746   | 0.27%                | 0.29%          | 0.21%                |
| UL17    | gene    | E        | Unknown         | 315    | 8              | 166            | 704   | 0.07%                | 0.08%          | 0.06%                | 14             | 198            | 495   | 0.13%                | 0.13%          | 0.05%                | 13             | 276            | 723   | 0.12%                | 0.12%          | 0.09%                | 12             | 213            | 641   | 0.11%                | 0.11%          | 0.07%                |
| UL18    | gene    | L        | Glycoprotein    | 1107   | 22             | 1033           | 463   | 0.10%                | 0.17%          | 0.08%                | 37             | 856            | 385   | 0.17%                | 0.19%          | 0.12%                | 31             | 418            | 279   | 0.14%                | 0.12%          | 0.11%                | 30             | 769            | 376   | 0.14%                | 0.16%          | 0.10%                |
| UL19    | gene    | unk      | Unknown         | 297    | 0              | 0              | 255   | 0.00%                | 0.00%          | 0.00%                | 2              | 72             | 1538  | 0.02%                | 0.02%          | 0.00%                | 0              | 0              | 255   | 0.00%                | 0.00%          | 0.00%                | 1              | 24             | 683   | 0.01%                | 0.01%          | 0.00%                |
| UL20    | gene    | unk      | Glycoprotein    | 1017   | 2              | 61             | 774   | 0.01%                | 0.01%          | 0.01%                | 4              | 21             | 164   | 0.01%                | 0.01%          | 0.01%                | 5              | 56             | 220   | 0.02%                | 0.01%          | 0.01%                | 4              | 46             | 386   | 0.01%                | 0.01%          | 0.01%                |
| UL21A   | gene    | E-L      | Glycoprotein    | 372    | 14             | 1181           | 3272  | 0.10%                | 0.10%          | 0.07%                | 6              | 58             | 290   | 0.05%                | 0.05%          | 0.02%                | 19             | 540            | 537   | 0.27%                | 0.27%          | 0.18%                | 13             | 593            | 1366  | 0.14%                | 0.14%          | 0.09%                |
| UL22A   | gene    | unk      | Glycoprotein    | 317    | 5              | 104            | 224   | 0.12%                | 0.15%          | 0.08%                | 24             | 7113           | 4962  | 0.39%                | 0.42%          | 0.18%                | 1              | 9              | 149   | 0.02%                | 0.02%          | 0.02%                | 10             | 2409           | 1778  | 0.17%                | 0.20%          | 0.09%                |
| UL23    | gene    | unk      | Matrix/Tegument | 855    | 31             | 137            | 109   | 0.13%                | 0.13%          | 0.10%                | 30             | 1553           | 1589  | 0.11%                | 0.11%          | 0.06%                | 9              | 30             | 44    | 0.08%                | 0.09%          | 0.05%                | 23             | 573            | 581   | 0.11%                | 0.11%          | 0.07%                |
| UL24    | gene    | E-L      | Matrix/Tegument | 903    | 38             | 162            | 133   | 0.13%                | 0.13%          | 0.12%                | 29             | 1760           | 1704  | 0.11%                | 0.11%          | 0.03%                | 17             | 95             | 52    | 0.18%                | 0.19%          | 0.14%                | 28             | 672            | 630   | 0.14%                | 0.15%          | 0.10%                |
| UL25    | gene    | L        | Matrix/Tegument | 1971   | 24             | 1286           | 625   | 0.09%                | 0.08%          | 0.06%                | 174            | 71416          | 5921  | 0.43%                | 0.61%          | 0.17%                | 78             | 1599           | 212   | 0.27%                | 0.27%          | 0.17%                | 92             | 24767          | 2253  | 0.26%                | 0.32%          | 0.14%                |
| UL26    | gene    | E        | Matrix/Tegument | 567    | 17             | 127            | 132   | 0.14%                | 0.16%          | 0.11%                | 104            | 7066           | 1906  | 0.62%                | 0.65%          | 0.14%                | 17             | 69             | 43    | 0.23%                | 0.23%          | 0.13%                | 46             | 2421           | 694   | 0.33%                | 0.35%          | 0.13%                |
| UL27    | gene    | E        | Unknown         | 1827   | 167            | 7178           | 1046  | 0.35%                | 0.38%          | 0.29%                | 208            | 19203          | 1897  | 0.46%                | 0.55%          | 0.22%                | 174            | 1181           | 153   | 0.41%                | 0.42%          | 0.28%                | 183            | 9187           | 1032  | 0.41%                | 0.45%          | 0.26%                |
| UL29    | gene    | E        | Unknown         | 2102   | 144            | 3909           | 728   | 0.25%                | 0.26%          | 0.19%                | 142            | 3457           | 582   | 0.28%                | 0.28%          | 0.14%                | 174            | 1030           | 136   | 0.35%                | 0.35%          | 0.23%                | 153            | 2799           | 482   | 0.29%                | 0.30%          | 0.19%                |
| UL30    | gene    | unk      | Unknown         | 366    | 14             | 235            | 650   | 0.10%                | 0.10%          | 0.08%                | 5              | 97             | 564   | 0.04%                | 0.05%          | 0.03%                | 22             | 101            | 133   | 0.20%                | 0.20%          | 0.15%                | 14             | 144            | 449   | 0.11%                | 0.12%          | 0.08%                |
| UL31    | gene    | L        | Unknown         | 1788   | 117            | 23870          | 4166  | 0.29%                | 0.32%          | 0.24%                | 133            | 13960          | 1908  | 0.30%                | 0.38%          | 0.14%                | 91             | 1411           | 274   | 0.24%                | 0.20%          | 0.17%                | 114            | 12780          | 2116  | 0.28%                | 0.30%          | 0.18%                |
| UL32    | gene    | L        | Matrix/Tegument | 3150   | 205            | 20715          | 1388  | 0.37%                | 0.47%          | 0.29%                | 301            | 8604           | 725   | 0.37%                | 0.38%          | 0.19%                | 134            | 725            | 72    | 0.31%                | 0.29%          | 0.22%                | 213            | 10015          | 728   | 0.35%                | 0.38%          | 0.23%                |
| UL33    | gene    | E        | Glycoprotein    | 1238   | 29             | 881            | 674   | 0.10%                | 0.10%          | 0.08%                | 38             | 2796           | 2067  | 0.10%                | 0.11%          | 0.03%                | 17             | 197            | 226   | 0.07%                | 0.06%          | 0.05%                | 28             | 1291           | 989   | 0.09%                | 0.09%          | 0.05%                |
| UL34    | gene    | E-L      | Regulatory      | 1224   | 126            | 2075           | 476   | 0.35%                | 0.36%          | 0.27%                | 112            | 5160           | 1314  | 0.31%                | 0.32%          | 0.14%                | 126            | 2286           | 461   | 0.38%                | 0.41%          | 0.28%                | 121            | 3174           | 750   | 0.35%                | 0.36%          | 0.23%                |
| UL35    | gene    | E        | Matrix/Tegument | 1926   | 106            | 3282           | 930   | 0.19%                | 0.18%          | 0.15%                | 119            | 6941           | 1708  | 0.22%                | 0.21%          | 0.12%                | 124            | 2127           | 461   | 0.22%                | 0.24%          | 0.18%                | 116            | 4117           | 1033  | 0.21%                | 0.21%          | 0.15%                |
| UL36    | gene    | IE       | Matrix/Tegument | 1430   | 67             | 878            | 318   | 0.18%                | 0.19%          | 0.14%                | 41             | 1542           | 958   | 0.10%                | 0.11%          | 0.06%                | 37             | 1254           | 873   | 0.09%                | 0.10%          | 0.07%                | 48             | 1225           | 717   | 0.13%                | 0.13%          | 0.09%                |
| UL37    | gene    | IE       | Regulatory      | 1465   | 46             | 274            | 220   | 0.21%                | 0.19%          | 0.10%                | 79             | 762            | 219   | 0.34%                | 0.34%          | 0.09%                | 10             | 36             | 67    | 0.06%                | 0.06%          | 0.05%                | 45             | 357            | 169   | 0.20%                | 0.19%          | 0.08%                |
| UL38    | gene    | IE       | Unknown         | 966    | 37             | 530            | 127   | 0.12%                | 0.12%          | 0.16%                | 58             | 2171           | 428   | 0.17%                | 0.34%          | 0.16%                | 17             | 166            | 72    | 0.10%                | 0.11%          | 0.04%                | 37             | 956            | 209   | 0.13%                | 0.19%          | 0.12%                |
| UL40    | gene    | E-L      | Regulatory      | 666    | 55             | 819            | 330   | 0.36%                | 0.37%          | 0.24%                | 57             | 857            | 320   | 0.38%                | 0.40%          | 0.16%                | 42             | 11072          | 6186  | 0.26%                | 0.27%          | 0.17%                | 51             | 4249           | 2279  | 0.33%                | 0.35%          | 0.19%                |
| UL41A   | gene    | L        | Unknown         | 237    | 14             | 106            | 217   | 0.21%                | 0.21%          | 0.17%                | 11             | 113            | 207   | 0.24%                | 0.23%          | 0.16%                | 7              | 842            | 3278  | 0.13%                | 0.11%          | 0.09%                | 11             | 354            | 1234  | 0.19%                | 0.18%          | 0.14%                |
| UL42    | gene    | unk      | Unknown         | 378    | 25             | 325            | 340   | 0.24%                | 0.25%          | 0.18%                | 27             | 313            | 309   | 0.25%                | 0.27%          | 0.11%                | 19             | 3657           | 4653  | 0.20%                | 0.21%          | 0.17%                | 24             | 1432           | 1767  | 0.23%                | 0.24%          | 0.15%                |
| UL43    | gene    | L        | Matrix/Tegument | 1272   | 178            | 9054           | 1187  | 0.57%                | 0.60%          | 0.43%                | 194            | 10982          | 1203  | 0.63%                | 0.63%          | 0.29%                | 122            | 8963           | 1525  | 0.42%                | 0.43%          | 0.30%                | 165            | 9666           | 1305  | 0.54%                | 0.55%          | 0.34%                |
| UL44    | gene    | E-L      | DNA Replication | 1302   | 76             | 558            | 167   | 0.25%                | 0.26%          | 0.12%                | 86             | 2927           | 707   | 0.29%                | 0.32%          | 0.10%                | 22             | 101            | 54    | 0.17%                | 0.18%          | 0.05%                | 61             | 1195           | 310   | 0.23%                | 0.25%          | 0.09%                |
| UL45    | gene    | L        | Matrix/Tegument | 2721   | 122            | 2140           | 534   | 0.16%                | 0.15%          | 0.13%                | 185            | 12793          | 1964  | 0.24%                | 0.24%          | 0.12%                | 226            | 2215           | 257   | 0.32%                | 0.31%          | 0.22%                | 178            | 5716           | 918   | 0.24%                | 0.23%          | 0.16%                |
| UL46    | gene    | E-L      | capsid          | 2952   | 146            | 24194          | 859   | 0.18%                | 0.16%          | 0.14%                | 190            | 3950           | 407   | 0.23%                | 0.32%          | 0.10%                | 183            | 6675           | 1078  | 0.21%                | 0.20%          | 0.20%                | 173            | 11606          | 782   | 0.21%                | 0.23%          | 0.15%                |
| UL47    | gene    | E-L      | Matrix/Tegument | 873    | 43             | 1371           | 5050  | 0.17%                | 0.18%          | 0.14%                | 42             | 3078           | 2396  | 0.14%                | 0.15%          | 0.12%                | 69             | 467            | 191   | 0.28%                | 0.28%          | 0.15%                |                |                |       |                      |                |                      |

|        |      |      |                 |      |     |       |      |       |       |       |     |       |      |       |       |       |     |       |      |       |       |       |     |       |       |       |       |       |
|--------|------|------|-----------------|------|-----|-------|------|-------|-------|-------|-----|-------|------|-------|-------|-------|-----|-------|------|-------|-------|-------|-----|-------|-------|-------|-------|-------|
| UL84   | gene | E-L  | DNA Replication | 1764 | 171 | 5809  | 806  | 0.40% | 0.41% | 0.29% | 155 | 1176  | 154  | 0.39% | 0.41% | 0.15% | 143 | 40175 | 4413 | 0.40% | 0.52% | 0.23% | 156 | 15720 | 1791  | 0.40% | 0.45% | 0.22% |
| UL85   | gene | E-L  | capsid          | 921  | 61  | 2898  | 1180 | 0.26% | 0.27% | 0.21% | 72  | 1066  | 303  | 0.37% | 0.38% | 0.19% | 67  | 13896 | 4218 | 0.32% | 0.36% | 0.24% | 67  | 5953  | 1900  | 0.32% | 0.34% | 0.21% |
| UL86   | gene | E-L  | capsid          | 4113 | 219 | 6781  | 717  | 0.22% | 0.23% | 0.15% | 180 | 3954  | 624  | 0.15% | 0.15% | 0.07% | 173 | 19960 | 3466 | 0.14% | 0.14% | 0.09% | 191 | 10232 | 1602  | 0.17% | 0.17% | 0.11% |
| UL87   | gene | E-L  | Matrix?         | 2826 | 163 | 2065  | 204  | 0.29% | 0.30% | 0.21% | 196 | 7063  | 882  | 0.28% | 0.28% | 0.13% | 227 | 65160 | 5463 | 0.33% | 0.42% | 0.25% | 195 | 24763 | 2183  | 0.30% | 0.34% | 0.20% |
| UL88   | gene | unk  | Matrix/Tegument | 1290 | 95  | 2109  | 279  | 0.40% | 0.52% | 0.26% | 131 | 4059  | 570  | 0.45% | 0.55% | 0.22% | 107 | 9266  | 2465 | 0.27% | 0.29% | 0.17% | 109 | 5145  | 1104  | 0.37% | 0.45% | 0.22% |
| UL89   | gene | E-L  | DNA Packaging   | 2024 | 38  | 351   | 241  | 0.22% | 0.23% | 0.18% | 47  | 544   | 224  | 0.25% | 0.26% | 0.18% | 36  | 5551  | 254  | 0.18% | 0.18% | 0.21% | 40  | 2149  | 239   | 0.22% | 0.22% | 0.19% |
| UL91   | gene | L    | Unknown         | 606  | 107 | 7341  | 204  | 0.28% | 0.30% | 0.09% | 158 | 9269  | 273  | 0.39% | 0.49% | 0.13% | 113 | 29050 | 6886 | 0.26% | 0.24% | 0.12% | 126 | 15220 | 2454  | 0.31% | 0.34% | 0.12% |
| UL92   | gene | L    | Unknown         | 1785 | 38  | 638   | 254  | 0.16% | 0.17% | 0.18% | 39  | 672   | 352  | 0.16% | 0.17% | 0.13% | 48  | 7198  | 5193 | 0.20% | 0.21% | 0.15% | 42  | 2836  | 1933  | 0.17% | 0.18% | 0.15% |
| UL93   | gene | L    | DNA Packaging   | 1038 | 125 | 2271  | 1350 | 0.34% | 0.29% | 0.19% | 126 | 1813  | 1047 | 0.35% | 0.28% | 0.20% | 51  | 26175 | 6760 | 0.21% | 0.23% | 0.17% | 101 | 10086 | 3052  | 0.30% | 0.26% | 0.19% |
| UL94   | gene | L    | Matrix/Tegument | 1602 | 99  | 2467  | 358  | 0.23% | 0.24% | 0.14% | 428 | 13225 | 385  | 0.30% | 0.36% | 0.07% | 342 | 75348 | 3282 | 0.23% | 0.22% | 0.15% | 290 | 30347 | 1342  | 0.25% | 0.27% | 0.12% |
| UL95   | gene | E-L  | Matrix?         | 5928 | 325 | 11107 | 462  | 0.25% | 0.27% | 0.23% | 148 | 2427  | 393  | 0.32% | 0.30% | 0.16% | 132 | 31463 | 5438 | 0.27% | 0.27% | 0.17% | 202 | 15012 | 2097  | 0.28% | 0.28% | 0.18% |
| UL96   | gene | E-L  | Matrix/Tegument | 384  | 19  | 115   | 513  | 0.16% | 0.16% | 0.15% | 16  | 95    | 396  | 0.11% | 0.11% | 0.06% | 18  | 90    | 5806 | 0.13% | 0.13% | 0.09% | 18  | 100   | 2238  | 0.13% | 0.13% | 0.10% |
| UL97   | gene | E-L  | Matrix/Tegument | 2124 | 140 | 1498  | 187  | 0.29% | 0.26% | 0.21% | 166 | 1986  | 222  | 0.34% | 0.27% | 0.14% | 182 | 7330  | 183  | 0.36% | 0.36% | 0.27% | 163 | 3605  | 197   | 0.33% | 0.30% | 0.21% |
| UL98   | gene | E-L  | DNA Replication | 1755 | 155 | 1199  | 247  | 0.36% | 0.35% | 0.25% | 193 | 1983  | 332  | 0.44% | 0.47% | 0.22% | 200 | 16663 | 939  | 0.51% | 0.47% | 0.36% | 183 | 6615  | 506   | 0.44% | 0.43% | 0.28% |
| UL99   | gene | L    | Envelope        | 573  | 33  | 597   | 189  | 0.20% | 0.24% | 0.16% | 50  | 1578  | 238  | 0.38% | 0.42% | 0.21% | 41  | 7496  | 2025 | 0.34% | 0.53% | 0.20% | 41  | 3224  | 817   | 0.31% | 0.40% | 0.19% |
| UL100  | gene | E-L  | Glycoprotein    | 1116 | 0   | 0     | 405  | 0.00% | 0.00% | 0.00% | 51  | 2808  | 657  | 0.17% | 0.17% | 0.08% | 25  | 129   | 2469 | 0.15% | 0.14% | 0.08% | 25  | 979   | 1177  | 0.11% | 0.10% | 0.05% |
| UL102  | gene | L    | DNA Replication | 2622 | 0   | 0     | 34   | 0.00% | 0.00% | 0.00% | 334 | 3376  | 1486 | 0.59% | 0.62% | 0.23% | 112 | 558   | 77   | 0.40% | 0.39% | 0.26% | 149 | 1311  | 533   | 0.33% | 0.34% | 0.16% |
| UL103  | gene | L    | Matrix/Tegument | 750  | 0   | 0     | 7    | 0.00% | 0.00% | 0.00% | 33  | 276   | 207  | 0.13% | 0.14% | 0.09% | 14  | 53    | 54   | 0.09% | 0.09% | 0.07% | 16  | 110   | 89    | 0.07% | 0.08% | 0.05% |
| UL104  | gene | E    | capsid          | 2871 | 97  | 814   | 7    | 0.18% | 0.14% | 0.07% | 207 | 61019 | 264  | 0.28% | 0.22% | 0.16% | 253 | 21232 | 77   | 0.34% | 0.34% | 0.08% | 186 | 27688 | 116   | 0.27% | 0.23% | 0.10% |
| UL105  | gene | E    | DNA Replication | 2094 | 26  | 190   | 117  | 0.08% | 0.07% | 0.13% | 169 | 11204 | 255  | 0.31% | 0.39% | 0.15% | 43  | 1843  | 255  | 0.14% | 0.07% | 0.25% | 79  | 4412  | 209   | 0.17% | 0.18% | 0.18% |
| UL111A | gene | E-L  | Immune Evasion  | 183  | 0   | 0     | 147  | 0.00% | 0.00% | 0.00% | 636 | 635   | 9619 | 0.38% | 0.35% | 0.03% | 0   | 0     | 2179 | 0.00% | 0.00% | 0.00% | 12  | 212   | 3982  | 0.13% | 0.12% | 0.01% |
| UL112  | gene | E    | DNA Replication | 2054 | 65  | 696   | 96   | 0.15% | 0.17% | 0.10% | 320 | 9543  | 1380 | 0.64% | 0.64% | 0.35% | 19  | 135   | 649  | 0.13% | 0.15% | 0.05% | 135 | 3458  | 709   | 0.31% | 0.32% | 0.16% |
| UL114  | gene | E    | DNA Replication | 753  | 10  | 37    | 31   | 0.07% | 0.08% | 0.06% | 70  | 2200  | 348  | 0.34% | 0.33% | 0.17% | 0   | 0     | 3    | 0.00% | 0.00% | 0.00% | 27  | 746   | 127   | 0.14% | 0.14% | 0.08% |
| UL115  | gene | L    | Glycoprotein    | 837  | 26  | 210   | 175  | 0.18% | 0.16% | 0.16% | 66  | 2671  | 624  | 0.29% | 0.30% | 0.15% | 35  | 261   | 54   | 0.22% | 0.21% | 0.19% | 42  | 1047  | 284   | 0.23% | 0.22% | 0.17% |
| UL116  | gene | E-L  | Unknown         | 942  | 6   | 57    | 62   | 0.02% | 0.02% | 0.02% | 57  | 3052  | 884  | 0.34% | 0.32% | 0.16% | 34  | 190   | 17   | 0.22% | 0.17% | 0.17% | 32  | 1100  | 321   | 0.19% | 0.17% | 0.11% |
| UL117  | gene | L    | Unknown         | 1278 | 1   | 3     | 116  | 0.01% | 0.01% | 0.00% | 149 | 5396  | 1082 | 0.64% | 0.61% | 0.29% | 50  | 198   | 139  | 0.29% | 0.22% | 0.17% | 67  | 1866  | 446   | 0.31% | 0.28% | 0.15% |
| UL119  | gene | E    | Glycoprotein    | 1037 | 21  | 133   | 203  | 0.12% | 0.09% | 0.11% | 11  | 890   | 1001 | 0.04% | 0.02% | 0.01% | 14  | 84    | 100  | 0.14% | 0.12% | 0.09% | 15  | 369   | 435   | 0.10% | 0.08% | 0.07% |
| UL120  | gene | L    | Unknown         | 606  | 2   | 9     | 22   | 0.03% | 0.03% | 0.03% | 10  | 359   | 691  | 0.08% | 0.10% | 0.02% | 3   | 10    | 67   | 0.02% | 0.02% | 0.02% | 5   | 126   | 260   | 0.04% | 0.05% | 0.02% |
| UL121  | gene | L    | Unknown         | 543  | 21  | 109   | 117  | 0.19% | 0.20% | 0.15% | 22  | 927   | 3497 | 0.16% | 0.17% | 0.07% | 22  | 145   | 73   | 0.18% | 0.20% | 0.14% | 22  | 394   | 1229  | 0.18% | 0.19% | 0.12% |
| UL122  | gene | IE-L | Regulatory      | 1741 | 8   | 91    | 67   | 0.02% | 0.02% | 0.08% | 18  | 586   | 605  | 0.03% | 0.04% | 0.12% | 12  | 229   | 86   | 0.03% | 0.04% | 0.11% | 13  | 302   | 252   | 0.03% | 0.03% | 0.10% |
| UL123  | gene | IE   | Regulatory      | 1474 | 32  | 153   | 92   | 0.11% | 0.11% | 0.01% | 102 | 3671  | 985  | 0.23% | 0.24% | 0.02% | 54  | 311   | 126  | 0.14% | 0.15% | 0.02% | 63  | 1378  | 401   | 0.16% | 0.17% | 0.02% |
| UL124  | gene | E    | Unknown         | 453  | 53  | 1102  | 75   | 0.53% | 0.48% | 0.46% | 48  | 847   | 887  | 0.57% | 0.39% | 0.21% | 57  | 1059  | 106  | 0.55% | 0.57% | 0.48% | 53  | 1003  | 355   | 0.48% | 0.48% | 0.38% |
| UL128  | gene | E    | Glycoprotein    | 391  | 22  | 795   | 213  | 0.23% | 0.25% | 0.20% | 18  | 227   | 1105 | 0.22% | 0.22% | 0.09% | 21  | 1930  | 336  | 0.21% | 0.23% | 0.18% | 20  | 984   | 551   | 0.22% | 0.23% | 0.16% |
| UL130  | gene | E-L  | Glycoprotein    | 645  | 10  | 462   | 507  | 0.04% | 0.05% | 0.03% | 18  | 241   | 481  | 0.08% | 0.09% | 0.03% | 7   | 863   | 411  | 0.04% | 0.04% | 0.03% | 12  | 522   | 466   | 0.06% | 0.06% | 0.03% |
| UL131A | gene | L    | Glycoprotein    | 389  | 34  | 7296  | 800  | 0.35% | 0.27% | 0.31% | 28  | 420   | 270  | 0.41% | 0.44% | 0.29% | 24  | 2841  | 2147 | 0.30% | 0.28% | 0.24% | 29  | 3519  | 1072  | 0.35% | 0.33% | 0.28% |
| UL132  | gene | E-L  | Glycoprotein    | 813  | 15  | 1283  | 1588 | 0.07% | 0.08% | 0.05% | 18  | 243   | 433  | 0.10% | 0.11% | 0.03% | 19  | 1889  | 3012 | 0.09% | 0.06% | 0.17% | 17  | 1138  | 1677  | 0.09% | 0.09% | 0.05% |
| UL148A | gene | unk  | Unknown         | 951  | 33  | 4977  | 6865 | 0.11% | 0.12% | 0.09% | 38  | 1320  | 244  | 0.14% | 0.12% | 0.09% | 32  | 8989  | 2571 | 0.14% | 0.13% | 0.10% | 34  | 5095  | 3227  | 0.13% | 0.12% | 0.09% |
| UL147A | gene | unk  | Unknown         | 228  | 0   | 0     | 2018 | 0.00% | 0.00% | 0.00% | 0   | 0     | 278  | 0.00% | 0.00% | 0.00% | 0   | 0     | 2397 | 0.00% | 0.00% | 0.00% | 0   | 1564  | 0.00% | 0.00% | 0.00% |       |
| UL147  | gene | E-L  | Regulatory      | 480  | 0   | 0     | 4449 | 0.00% | 0.00% | 0.00% | 1   | 144   | 1183 | 0.01% | 0.01% | 0.01% | 2   | 25    | 7394 | 0.02% | 0.02% | 0.01% | 1   | 56    | 4342  | 0.01% | 0.01% | 0.01% |
| UL146  | gene | unk  | Regulatory      | 363  | 0   | 0     | 255  | 0.00% | 0.00% | 0.00% | 0   | 0     | 2105 | 0.00% | 0.00% | 0.00% | 0   | 0     | 227  | 0.00% | 0.00% | 0.00% | 0   | 0     | 862   | 0.00% | 0.00% | 0.00% |
| UL145  | gene | unk  | Unknown         | 393  | 1   | 28    | 1162 | 0.01% | 0.01% | 0.00% | 1   | 18    | 672  | 0.01% | 0.01% | 0.01% | 1   | 61    | 1975 | 0.01% | 0.01% | 0.00% | 1   | 36    | 1270  | 0.01% | 0.01% | 0.00% |
| UL144  | gene | unk  | Glycoprotein    | 531  | 0   | 0     | 252  | 0.00% | 0.00% | 0.00% | 1   | 5     | 103  | 0.01% | 0.01% | 0.01% | 4   | 1914  | 922  | 0.16% | 0.27% | 0.07% | 2   | 640   | 426   | 0.06% | 0.09% | 0.03% |
| UL142  | gene | unk  | Glycoprotein    | 918  | 4   | 50    | 357  | 0.02% | 0.02% | 0.01% | 10  | 94    | 211  | 0.05% | 0.05% | 0.03% | 18  | 248   | 288  | 0.09% | 0.09% | 0.07% | 11  | 131   | 285   | 0.05% | 0.05% | 0.04% |
| UL141  | gene | unk  | Glycoprotein    | 1017 | 47  | 7599  | 3205 | 0.23% | 0.22% | 0.14% | 72  | 7571  | 2847 | 0.38% | 0.26% | 0.21% | 81  | 14368 | 3483 | 0.44% | 0.41% | 0.31% | 67  | 9846  | 3178  | 0.35% | 0.30% | 0.22% |
| UL140  | gene | unk  | Unknown         | 576  | 3   | 16    | 46   | 0.06% | 0.06% | 0.05% | 40  | 4782  | 3009 | 0.26% | 0.28% | 0.14% | 83  | 2567  | 759  | 0.53% | 0.59% | 0.46% | 42  | 2455  | 1271  | 0.29% | 0.31% | 0.22% |
| UL139  | gene | unk  | Glycoprotein    | 417  | 0   | 0     | 21   | 0.00% | 0.00% | 0.00% | 0   | 0     | 190  | 0.00% | 0.00% | 0.00% | 20  | 435   | 359  | 0.26% | 0.30% | 0.20% | 7   | 145   | 183   | 0.09% | 0.10% | 0.07% |
| UL138  | gene | unk  | Regulatory      | 510  | 1   | 4     | 39   | 0.01% | 0.01% | 0.00% | 26  | 3347  | 3576 | 0.17% | 0.18% | 0.09% | 17  | 628   | 886  | 0.13% | 0.14% | 0.12% | 15  | 1326  | 1500  | 0.10% | 0.11% | 0.07% |
| UL136  | gene | unk  | Unknown         | 723  | 0   | 0     | 17   | 0.00% | 0.00% | 0.00% | 106 | 10204 | 2746 | 0.50% | 0.51% | 0.25% | 123 | 2970  | 641  | 0.61% | 0.64% | 0.49% | 76  | 4391  | 1134  | 0.37% | 0.39% | 0.25% |
| UL135  | gene | unk  | Unknown         | 927  | 5   | 18    | 26   | 0.07% | 0.07% | 0.06% | 133 | 10466 | 2044 | 0.53% | 0.55% | 0.24% | 132 | 6095  | 1146 | 0.59% | 0.57% | 0.41% | 90  | 5526  | 1072  | 0.40% | 0.40% | 0.24% |
| UL133  | gene | unk  | Unknown         | 774  | 0   | 0     | 5    | 0.00% | 0.00% | 0.00% | 76  | 6471  | 2021 | 0.39% | 0.41% | 0.18% | 79  | 3911  | 833  | 0.43% | 0.48% | 0.27% | 52  | 3191  | 953   | 0.27% | 0.30% | 0.15% |
| UL148A | gene | unk  | Unknown         | 243  | 8   | 191   | 874  | 0.08% | 0.09% | 0.08% | 13  | 778   | 1060 | 0.30% | 0.30% | 0.08% | 6   | 136   | 135  | 0.22% | 0.34% | 0.1   |     |       |       |       |       |       |

|        |       |     |            |        |      |        |      |       |       |       |       |        |       |       |       |       |      |        |      |       |       |       |      |        |      |       |       |       |
|--------|-------|-----|------------|--------|------|--------|------|-------|-------|-------|-------|--------|-------|-------|-------|-------|------|--------|------|-------|-------|-------|------|--------|------|-------|-------|-------|
| US30   | gene  | E   | Unknown    | 1050   | 31   | 661    | 554  | 0.11% | 0.11% | 0.09% | 0     | 0      | 20    | 0.00% | 0.00% | 0.00% | 21   | 784    | 1175 | 0.06% | 0.06% | 0.05% | 17   | 482    | 583  | 0.06% | 0.06% | 0.05% |
| US31   | gene  | unk | Unknown    | 486    | 28   | 812    | 561  | 0.29% | 0.30% | 0.25% | 0     | 0      | 5     | 0.00% | 0.00% | 0.00% | 41   | 1842   | 1026 | 0.35% | 0.37% | 0.29% | 23   | 885    | 531  | 0.21% | 0.22% | 0.18% |
| US32   | gene  | L   | Unknown    | 552    | 42   | 858    | 577  | 0.26% | 0.27% | 0.23% | 0     | 0      | 5     | 0.00% | 0.00% | 0.00% | 42   | 1893   | 982  | 0.33% | 0.35% | 0.27% | 28   | 917    | 521  | 0.20% | 0.21% | 0.16% |
| US34   | gene  | E   | Unknown    | 492    | 27   | 650    | 581  | 0.24% | 0.23% | 0.22% | 44    | 1363   | 730   | 0.36% | 0.38% | 0.21% | 23   | 1298   | 1461 | 0.17% | 0.18% | 0.16% | 31   | 1104   | 924  | 0.26% | 0.26% | 0.20% |
| US34A  | gene  | unk | Unknown    | 195    | 1    | 9      | 370  | 0.01% | 0.01% | 0.01% | 1     | 10     | 523   | 0.01% | 0.01% | 0.01% | 0    | 0      | 255  | 0.00% | 0.00% | 0.00% | 1    | 6      | 383  | 0.01% | 0.01% | 0.01% |
| TR51   | gene  | E   | Regulatory | 2367   | 54   | 4688   | 1108 | 0.14% | 0.17% | 0.09% | 58    | 8772   | 3297  | 0.11% | 0.11% | 0.05% | 53   | 15080  | 5980 | 0.11% | 0.11% | 0.08% | 55   | 9513   | 3462 | 0.12% | 0.13% | 0.08% |
| UL112  | miRNA |     |            | 67     | 0    | 0      | 72   | 0.00% | 0.00% | NA    | 0     | 0      | 1124  | 0.00% | 0.00% | NA    | 0    | 0      | 53   | 0.00% | 0.00% | NA    | 0    | 0      | 416  | 0.00% | 0.00% | NA    |
| UL148D | miRNA |     |            | 72     | 1    | 4      | 3960 | 0.03% | 0.03% | NA    | 0     | 0      | 10077 | 0.00% | 0.00% | NA    | 0    | 0      | 2656 | 0.00% | 0.00% | NA    | 0    | 1      | 5564 | 0.01% | 0.01% | NA    |
| UL22A  | miRNA |     |            | 68     | 5    | 184    | 221  | 0.22% | 0.22% | NA    | 12    | 1305   | 4483  | 0.91% | 0.99% | NA    | 0    | 0      | 147  | 0.00% | 0.00% | NA    | 6    | 496    | 1617 | 0.38% | 0.40% | NA    |
| UL36   | miRNA |     |            | 75     | 1    | 4      | 187  | 0.07% | 0.07% | NA    | 0     | 0      | 944   | 0.00% | 0.00% | NA    | 0    | 0      | 875  | 0.00% | 0.00% | NA    | 0    | 1      | 669  | 0.02% | 0.02% | NA    |
| UL70   | miRNA |     |            | 62     | 5    | 550    | 1349 | 0.19% | 0.20% | NA    | 5     | 1798   | 2167  | 0.24% | 0.25% | NA    | 8    | 757    | 544  | 0.39% | 0.40% | NA    | 6    | 1035   | 1353 | 0.27% | 0.28% | NA    |
| US25-1 | miRNA |     |            | 70     | 3    | 39     | 33   | 0.10% | 0.10% | NA    | 1     | 30     | 612   | 0.03% | 0.03% | NA    | 0    | 0      | 27   | 0.00% | 0.00% | NA    | 1    | 23     | 224  | 0.04% | 0.04% | NA    |
| US25-2 | miRNA |     |            | 90     | 0    | 0      | 61   | 0.00% | 0.00% | NA    | 1     | 137    | 642   | 0.04% | 0.04% | NA    | 1    | 25     | 91   | 0.04% | 0.04% | NA    | 1    | 54     | 265  | 0.03% | 0.03% | NA    |
| US33   | miRNA |     |            | 70     | 0    | 0      | 100  | 0.00% | 0.00% | NA    | 0     | 0      | 1459  | 0.00% | 0.00% | NA    | 0    | 0      | 1321 | 0.00% | 0.00% | NA    | 0    | 0      | 960  | 0.00% | 0.00% | NA    |
| US4    | miRNA |     |            | 84     | 3    | 11     | 476  | 0.45% | 0.50% | NA    | 16    | 476    | 1369  | 1.06% | 1.13% | NA    | 0    | 0      | 22   | 0.00% | 0.00% | NA    | 6    | 162    | 622  | 0.50% | 0.54% | NA    |
| US5-1  | miRNA |     |            | 66     | 0    | 0      | 431  | 0.00% | 0.00% | NA    | 3     | 46     | 5060  | 0.08% | 0.08% | NA    | 0    | 0      | 928  | 0.00% | 0.00% | NA    | 1    | 15     | 2140 | 0.03% | 0.03% | NA    |
| US5-2  | miRNA |     |            | 65     | 15   | 94     | 433  | 1.19% | 1.34% | NA    | 19    | 1249   | 5067  | 1.17% | 1.24% | NA    | 25   | 2386   | 908  | 2.17% | 2.62% | NA    | 20   | 1243   | 2136 | 1.51% | 1.73% | NA    |
| UL     | Misc  | NA  | NA         | 193019 | 7268 | 463036 | 1201 | 0.17% | 0.18% | NA    | 11679 | 704159 | 1347  | 0.26% | 0.26% | NA    | 8964 | 843029 | 1528 | 0.21% | 0.25% | NA    | 9304 | 670075 | 1358 | 0.21% | 0.23% | NA    |
| US     | Misc  | NA  | NA         | 35482  | 1248 | 98620  | 1409 | 0.16% | 0.17% | NA    | 1615  | 170137 | 2178  | 0.20% | 0.22% | NA    | 1329 | 100502 | 1312 | 0.19% | 0.18% | NA    | 1397 | 123086 | 1633 | 0.18% | 0.19% | NA    |
| TRL    | Misc  | NA  | NA         | 1324   | 8    | 256    | 882  | 0.02% | 0.02% | NA    | 1     | 198    | 306   | 0.02% | 0.03% | NA    | 2    | 47     | 26   | 0.01% | 0.14% | NA    | 4    | 167    | 404  | 0.02% | 0.06% | NA    |
| IRL    | Misc  | NA  | NA         | 1324   | 8    | 1142   | 1870 | 0.04% | 0.04% | NA    | 23    | 5533   | 6815  | 0.07% | 0.06% | NA    | 8    | 420    | 143  | 0.08% | 0.22% | NA    | 13   | 2365   | 2943 | 0.07% | 0.11% | NA    |
| IRS    | Misc  | NA  | NA         | 2557   | 13   | 855    | 420  | 0.03% | 0.07% | NA    | 22    | 18941  | 8263  | 0.06% | 0.09% | NA    | 7    | 416    | 155  | 0.04% | 0.11% | NA    | 14   | 6737   | 2946 | 0.04% | 0.09% | NA    |
| TRS    | Misc  | NA  | NA         | 2558   | 20   | 691    | 494  | 0.08% | 0.05% | NA    | 10    | 2361   | 1465  | 0.04% | 0.06% | NA    | 15   | 1378   | 1142 | 0.06% | 0.05% | NA    | 15   | 1477   | 1034 | 0.06% | 0.05% | NA    |
