# Supplementary material for: Extensive Genome-Wide Variability of Human Cytomegalovirus in Congenitally Infected Infants
Source: PubMed Central journal article supplement (PMC3098220; doi:10.1371/journal.ppat.1001344), 2011-05-19
Supplement: ppat.1001344.s014.pdf [file ppat.1001344.s014.pdf]

Table S5: ORFs that overlap selective sweeps in the HCMV genome

|       | ORF <sup>1</sup> | Kinetics        | Function        | ORF Start | ORF End | Sweep                    | Sweep                  | CLR <sup>2</sup> | p value <sup>3</sup><br>(<) | % of ORF<br>in Sweep<br>Window |
|-------|------------------|-----------------|-----------------|-----------|---------|--------------------------|------------------------|------------------|-----------------------------|--------------------------------|
|       |                  |                 |                 |           |         | Window<br>Start          | Window<br>End          |                  |                             |                                |
| U01   | UL9              | L               | Glycoprotein    | 16947     | 17648   | 17386                    | 17621                  | 5.11             | 0.044                       | 34                             |
|       | UL10             | unk             | Unknown         | 17776     | 18540   | 17622                    | 17857                  | 5.66             | 0.019                       | 41                             |
|       | UL10             | unk             | Unknown         | 17776     | 18540   | 17857                    | 18092                  | 5.18             | 0.043                       |                                |
|       | UL25             | L               | Matrix/Tegument | 30402     | 32372   | 31285                    | 31520                  | 8.08             | 0.002                       | 48                             |
|       | UL25             | L               | Matrix/Tegument | 30402     | 32372   | 31520                    | 31755                  | 9.83             | 0.001                       |                                |
|       | UL25             | L               | Matrix/Tegument | 30402     | 32372   | 31756                    | 31991                  | 9.96             | 0.001                       |                                |
|       | UL25             | L               | Matrix/Tegument | 30402     | 32372   | 31991                    | 32226                  | 7.06             | 0.004                       |                                |
|       | UL27             | E               | Unknown         | 35008     | 33182   | 34347                    | 34582                  | 5.76             | 0.017                       | 13                             |
|       | UL45             | L               | Matrix/Tegument | 60663     | 57943   | 58846                    | 59081                  | 6.50             | 0.006                       | 60                             |
|       | UL45             | L               | Matrix/Tegument | 60663     | 57943   | 59082                    | 59317                  | 12.97            | 0.001                       |                                |
|       | UL45             | L               | Matrix/Tegument | 60663     | 57943   | 59317                    | 59552                  | 16.35            | 0.001                       |                                |
|       | UL45             | L               | Matrix/Tegument | 60663     | 57943   | 59553                    | 59788                  | 19.06            | 0.001                       |                                |
|       | UL45             | L               | Matrix/Tegument | 60663     | 57943   | 59788                    | 60023                  | 20.58            | 0.001                       |                                |
|       | UL45             | L               | Matrix/Tegument | 60663     | 57943   | 60024                    | 60259                  | 20.77            | 0.001                       |                                |
|       | UL45             | L               | Matrix/Tegument | 60663     | 57943   | 60260                    | 60495                  | 18.68            | 0.001                       |                                |
|       | UL47             | E-L             | Matrix/Tegument | 61678     | 60806   | 60731                    | 60966                  | 7.33             | 0.004                       | 18                             |
|       | UL80             | L               | capsid          | 116500    | 118626  | 117032                   | 117267                 | 5.59             | 0.023                       | 11                             |
|       | UL95             | E-L             | Matrix?         | 139697    | 133770  | 135170                   | 135405                 | 5.17             | 0.043                       | 4                              |
|       | UL100            | E-L             | Glycoprotein    | 147653    | 146538  | 146949                   | 147184                 | 5.91             | 0.011                       | 42                             |
|       | UL100            | E-L             | Glycoprotein    | 147653    | 146538  | 147184                   | 147419                 | 7.60             | 0.004                       |                                |
|       | UL102            | L               | DNA Replication | 147831    | 150452  | 147655                   | 147890                 | 10.35            | 0.001                       | 92                             |
|       | UL102            | L               | DNA Replication | 147831    | 150452  | 147891                   | 148126                 | 15.41            | 0.001                       |                                |
|       | UL102            | L               | DNA Replication | 147831    | 150452  | 148127                   | 148362                 | 19.24            | 0.001                       |                                |
|       | UL102            | L               | DNA Replication | 147831    | 150452  | 148362                   | 148597                 | 21.93            | 0.001                       |                                |
|       | UL102            | L               | DNA Replication | 147831    | 150452  | 148598                   | 148833                 | 23.57            | 0.001                       |                                |
|       | UL102            | L               | DNA Replication | 147831    | 150452  | 148833                   | 149068                 | 24.27            | 0.001                       |                                |
|       | UL102            | L               | DNA Replication | 147831    | 150452  | 149069                   | 149304                 | 24.16            | 0.001                       |                                |
|       | UL102            | L               | DNA Replication | 147831    | 150452  | 149304                   | 149539                 | 23.17            | 0.001                       |                                |
| UL102 | L                | DNA Replication | 147831          | 150452    | 149540  | 149775                   | 21.33                  | 0.001            |                             |                                |
| UL102 | L                | DNA Replication | 147831          | 150452    | 149776  | 150011                   | 18.69                  | 0.001            |                             |                                |
| UL102 | L                | DNA Replication | 147831          | 150452    | 150011  | 150246                   | 16.07                  | 0.001            |                             |                                |
| UL103 | L                | Matrix/Tegument | 151364          | 150615    | 150482  | 150717                   | 8.63                   | 0.002            | 14                          |                                |
| UL136 | unk              | Unknown         | 188755          | 188033    | 187938  | 188173                   | 5.60                   | 0.023            | 52                          |                                |
| UL136 | unk              | Unknown         | 188755          | 188033    | 188173  | 188408                   | 5.09                   | 0.046            |                             |                                |
| U04   | Feature          | Kinetics        | Function        | ORF Start | ORF End | Sweep<br>Window<br>Start | Sweep<br>Window<br>End | CLR              | p value<br>(<)              | % of ORF<br>in Sweep<br>Window |
|       | UL9              | L               | Glycoprotein    | 16744     | 17445   | 16666                    | 16901                  | 6.37             | 0.041                       | 22                             |
|       | UL36             | IE              | Matrix/Tegument | 49925     | 48595   | 48439                    | 48674                  | 15.15            | 0.001                       | 94                             |
|       | UL36             | IE              | Matrix/Tegument | 49925     | 48595   | 48674                    | 48909                  | 18.40            | 0.001                       |                                |
|       | UL36             | IE              | Matrix/Tegument | 49925     | 48595   | 48909                    | 49144                  | 20.63            | 0.001                       |                                |
|       | UL36             | IE              | Matrix/Tegument | 49925     | 48595   | 49145                    | 49380                  | 20.72            | 0.001                       |                                |
|       | UL36             | IE              | Matrix/Tegument | 49925     | 48595   | 49380                    | 49615                  | 20.02            | 0.001                       |                                |
|       | UL36             | IE              | Matrix/Tegument | 49925     | 48595   | 49616                    | 49851                  | 18.10            | 0.001                       |                                |
|       | UL47             | E-L             | Matrix/Tegument | 61475     | 60603   | 60442                    | 60677                  | 6.99             | 0.018                       | 9                              |
|       | UL69             | E-L             | regulatory      | 101544    | 99316   | 99275                    | 99510                  | 7.06             | 0.018                       | 9                              |
|       | UL83             | L               | Matrix/Tegument | 122138    | 120453  | 121398                   | 121633                 | 7.09             | 0.017                       | 42                             |
|       | UL83             | L               | Matrix/Tegument | 122138    | 120453  | 121634                   | 121869                 | 11.81            | 0.001                       |                                |
|       | UL83             | L               | Matrix/Tegument | 122138    | 120453  | 121869                   | 122104                 | 17.30            | 0.001                       |                                |
|       | UL84             | E-L             | DNA Replication | 124173    | 122410  | 122340                   | 122575                 | 20.22            | 0.001                       | 63                             |
|       | UL84             | E-L             | DNA Replication | 124173    | 122410  | 122575                   | 122810                 | 19.64            | 0.001                       |                                |
|       | UL84             | E-L             | DNA Replication | 124173    | 122410  | 122810                   | 123045                 | 17.79            | 0.001                       |                                |
|       | UL84             | E-L             | DNA Replication | 124173    | 122410  | 123046                   | 123281                 | 14.73            | 0.001                       |                                |
|       | UL84             | E-L             | DNA Replication | 124173    | 122410  | 123281                   | 123516                 | 9.56             | 0.002                       |                                |
|       | UL104            | E               | capsid          | 153030    | 155900  | 152936                   | 153171                 | 6.34             | 0.044                       | 5                              |
|       | UL105            | E               | DNA Replication | 153202    | 151109  | 152936                   | 153171                 | 6.34             | 0.044                       | 11                             |
|       | UL114            | E               | DNA Replication | 164847    | 164095  | 163997                   | 164232                 | 6.29             | 0.048                       | 18                             |
|       | UL123            | IE              | regulatory      | 173887    | 172329  | 172941                   | 173176                 | 6.72             | 0.024                       | 16                             |
|       | UL145            | unk             | Unknown         | 181762    | 181370  | 181413                   | 181648                 | 7.13             | 0.017                       | 60                             |
|       | UL139            | unk             | Glycoprotein    | 186675    | 186259  | 186356                   | 186591                 | 6.57             | 0.03                        | 56                             |
|       | IRS1             | IE              | regulatory      | 195773    | 198316  | 196005                   | 196240                 | 7.58             | 0.009                       | 18                             |
|       | IRS1             | IE              | regulatory      | 195773    | 198316  | 196241                   | 196476                 | 7.25             | 0.016                       |                                |
|       | US31             | unk             | Unknown         | 228815    | 229300  | 228719                   | 228954                 | 12.23            | 0.001                       | 77                             |
|       | US31             | unk             | Unknown         | 228815    | 229300  | 228955                   | 229190                 | 12.84            | 0.001                       |                                |
| US32  | L                | Unknown         | 229418          | 229969    | 229190  | 229425                   | 11.56                  | 0.001            | 44                          |                                |
| US32  | L                | Unknown         | 229418          | 229969    | 229426  | 229661                   | 7.39                   | 0.012            |                             |                                |
| U33   | Feature          | Kinetics        | Function        | ORF Start | ORF End | Sweep<br>Window<br>Start | Sweep<br>Window<br>End | CLR              | p value<br>(<)              | % of ORF<br>in Sweep<br>Window |
|       | UL4              | E               | Glycoprotein    | 13615     | 14067   | 13770                    | 14005                  | 6.40             | 0.008                       | 52                             |
|       | UL150            | unk             | Unknown         | 194057    | 192138  | 192744                   | 192979                 | 6.21             | 0.011                       | 12                             |

1. ORFs can be listed multiple times if overlapping with multiple sweep windows.  
2. CLR is the compositive likelihood ratio for the window as calculated by the program SweepFinder  
3. Simulations under a standard neutral model were used to calculate p values for the data. Only significant results (p < 0.05) are shown.
