# Supplementary material for: Extensive Genome-Wide Variability of Human Cytomegalovirus in Congenitally Infected Infants
Source: PubMed Central journal article supplement (PMC3098220; doi:10.1371/journal.ppat.1001344), 2011-05-19
Supplement: ppat.1001344.s015.pdf [file ppat.1001344.s015.pdf]

Table S6: Whole genome interhost polymorphism data from patient samples

| ORF   | Kinetics | Function        | U01           |                |            |              | U04           |                |            |              | U33           |                |            |              | Averages      |                |            |       |
|-------|----------|-----------------|---------------|----------------|------------|--------------|---------------|----------------|------------|--------------|---------------|----------------|------------|--------------|---------------|----------------|------------|-------|
|       |          |                 | Polymorphisms | Non-synonymous | Synonymous | dN/dS        | Polymorphisms | Non-synonymous | Synonymous | dN/dS        | Polymorphisms | Non-synonymous | Synonymous | dN/dS        | Polymorphisms | Non-synonymous | Synonymous | dN/dS |
| RL1   | unk      | Regulatory      | 15            | 8              | 7          | 0.38         | 10            | 6              | 4          | 0.55         | 22            | 10             | 12         | 0.27         | 15.7          | 8.0            | 7.7        | 0.40  |
| RL5A  | E        | Unknown         | 6             | 4              | 2          | 0.68         | 6             | 3              | 3          | 0.33         | 7             | 6              | 1          | 2.14         | 6.3           | 4.3            | 2.0        | 1.05  |
| RL6   | L        | Unknown         | 3             | 2              | 1          | 0.69         | 4             | 2              | 2          | 0.33         | 3             | 2              | 1          | 1.04         | 3.3           | 2.0            | 1.3        | 0.69  |
| RL10  | E-L      | Glycoprotein    | 9             | 1              | 8          | 0.04         | 10            | 5              | 5          | 0.33         | 5             | 1              | 4          | 0.03         | 8.0           | 2.3            | 5.7        | 0.13  |
| RL11  | L        | Glycoprotein    | 10            | 3              | 7          | 0.12         | 20            | 3              | 17         | 0.03         | 15            | 7              | 8          | 0.28         | 15.0          | 4.3            | 10.7       | 0.14  |
| RL12  | E-L      | Unknown         | 4             | 2              | 2          | 0.34         | 26            | 11             | 15         | 0.22         | 0             | 0              | 0          | No Mutations | 10.0          | 4.3            | 5.7        | 0.28  |
| RL13  | E-L      | Unknown         | 4             | 2              | 2          | 0.34         | 12            | 7              | 5          | 1.20         | 0             | 0              | 0          | No Mutations | 5.3           | 3.0            | 2.3        | 0.77  |
| UL1   | E-L      | Envelope        | 0             | 0              | 0          | No Mutations | 13            | 4              | 9          | 0.11         | 0             | 0              | 0          | No Mutations | 4.3           | 1.3            | 3.0        | 0.11  |
| UL2   | L        | Unknown         | 8             | 4              | 4          | 0.30         | 2             | 2              | 0          | Incalculable | 0             | 0              | 0          | No Mutations | 3.3           | 2.0            | 1.3        | 0.30  |
| UL4   | E        | Glycoprotein    | 10            | 6              | 4          | 0.54         | 20            | 7              | 12         | 0.13         | 4             | 3              | 1          | 2.44         | 11.3          | 5.3            | 5.7        | 1.04  |
| UL5   | E        | Unknown         | 22            | 8              | 14         | 0.15         | 16            | 9              | 7          | 0.56         | 6             | 4              | 2          | 1.39         | 14.7          | 7.0            | 7.7        | 0.70  |
| UL6   | unk      | Unknown         | 23            | 9              | 14         | 0.18         | 18            | 10             | 8          | 0.45         | 6             | 4              | 2          | 0.69         | 15.7          | 7.7            | 8.0        | 0.44  |
| UL7   | L        | Unknown         | 25            | 12             | 12         | 0.34         | 21            | 3              | 18         | 0.01         | 10            | 4              | 6          | 0.20         | 18.7          | 6.3            | 12.0       | 0.19  |
| UL8   | unk      | Unknown         | 13            | 6              | 7          | 0.26         | 10            | 7              | 3          | 1.40         | 8             | 5              | 3          | 0.64         | 10.3          | 6.0            | 4.3        | 0.77  |
| UL9   | L        | Glycoprotein    | 6             | 3              | 3          | 0.34         | 1             | 0              | 1          | 0.00         | 8             | 3              | 5          | 0.18         | 5.0           | 2.0            | 3.0        | 0.17  |
| UL10  | unk      | Unknown         | 32            | 14             | 18         | 0.22         | 28            | 13             | 15         | 0.26         | 12            | 4              | 8          | 0.11         | 24.0          | 10.3           | 13.7       | 0.20  |
| UL11  | E        | Glycoprotein    | 18            | 6              | 12         | 0.12         | 11            | 4              | 7          | 0.15         | 24            | 11             | 13         | 0.26         | 17.7          | 7.0            | 10.7       | 0.18  |
| UL13  | E        | Unknown         | 24            | 10             | 14         | 0.21         | 24            | 11             | 13         | 0.25         | 34            | 19             | 15         | 0.48         | 27.3          | 13.3           | 14.0       | 0.31  |
| UL14  | L        | Unknown         | 7             | 0              | 7          | 0.00         | 15            | 4              | 11         | 0.09         | 15            | 1              | 14         | 0.00         | 12.3          | 1.7            | 10.7       | 0.03  |
| UL15A | L        | Unknown         | 4             | 2              | 2          | 0.33         | 2             | 1              | 1          | 0.34         | 2             | 0              | 2          | 0.00         | 2.7           | 1.0            | 1.7        | 0.22  |
| UL16  | E        | Glycoprotein    | 16            | 4              | 12         | 0.07         | 5             | 2              | 3          | 0.22         | 13            | 2              | 11         | 0.05         | 11.3          | 2.7            | 8.7        | 0.11  |
| UL17  | E        | Unknown         | 4             | 1              | 3          | 0.11         | 0             | 0              | 0          | No Mutations | 6             | 2              | 4          | 0.12         | 3.3           | 1.0            | 2.3        | 0.11  |
| UL18  | L        | Glycoprotein    | 28            | 13             | 15         | 0.27         | 4             | 1              | 3          | 0.07         | 21            | 7              | 14         | 0.13         | 17.7          | 7.0            | 10.7       | 0.16  |
| UL19  | unk      | Unknown         | 0             | 0              | 0          | No Mutations | 4             | 0              | 3          | 0.00         | 3             | 1              | 2          | 0.16         | 2.3           | 0.3            | 1.7        | 0.08  |
| UL20  | unk      | Glycoprotein    | 30            | 12             | 18         | 0.19         | 26            | 8              | 17         | 0.08         | 27            | 8              | 18         | 0.07         | 27.7          | 9.3            | 17.7       | 0.11  |
| UL21A | E-L      | Glycoprotein    | 2             | 0              | 2          | 0.00         | 2             | 1              | 1          | 0.34         | 9             | 3              | 6          | 0.08         | 4.3           | 1.3            | 3.0        | 0.14  |
| UL22A | unk      | Glycoprotein    | 2             | 1              | 1          | 0.34         | 2             | 2              | 0          | Incalculable | 2             | 1              | 1          | 0.34         | 2.0           | 1.3            | 0.7        | 0.34  |
| UL23  | unk      | Matrix/Tegument | 8             | 4              | 4          | 0.34         | 2             | 0              | 2          | 0.00         | 9             | 5              | 4          | 0.45         | 6.3           | 3.0            | 3.3        | 0.26  |
| UL24  | E-L      | Matrix/Tegument | 9             | 2              | 7          | 0.08         | 0             | 0              | 0          | No Mutations | 9             | 2              | 7          | 0.07         | 6.0           | 1.3            | 4.7        | 0.07  |
| UL25  | L        | Matrix/Tegument | 9             | 2              | 7          | 0.08         | 1             | 0              | 0          | 0.00         | 30            | 10             | 18         | 0.14         | 13.3          | 4.0            | 8.3        | 0.07  |
| UL26  | E        | Matrix/Tegument | 2             | 0              | 2          | 0.00         | 6             | 3              | 3          | 0.34         | 2             | 1              | 1          | 0.34         | 3.3           | 1.3            | 2.0        | 0.23  |
| UL27  | E        | Unknown         | 16            | 7              | 9          | 0.26         | 6             | 3              | 3          | 0.40         | 20            | 6              | 14         | 0.13         | 14.0          | 5.3            | 8.7        | 0.26  |
| UL29  | E        | Unknown         | 23            | 1              | 22         | 0.01         | 4             | 1              | 3          | 0.09         | 30            | 9              | 21         | 0.12         | 19.0          | 3.7            | 15.3       | 0.07  |
| UL30  | unk      | Unknown         | 2             | 1              | 1          | 0.34         | 0             | 0              | 0          | No Mutations | 8             | 4              | 4          | 0.33         | 3.3           | 1.7            | 1.7        | 0.34  |
| UL31  | L        | Unknown         | 9             | 1              | 8          | 0.04         | 2             | 2              | 0          | Incalculable | 21            | 5              | 16         | 0.06         | 10.7          | 2.7            | 8.0        | 0.05  |
| UL32  | L        | Matrix/Tegument | 25            | 7              | 18         | 0.12         | 4             | 2              | 2          | 0.52         | 35            | 9              | 25         | 0.06         | 21.3          | 6.0            | 15.0       | 0.23  |
| UL33  | E        | Glycoprotein    | 25            | 5              | 20         | 0.07         | 1             | 0              | 1          | 0.00         | 10            | 4              | 5          | 0.16         | 12.0          | 3.0            | 8.7        | 0.08  |
| UL34  | E-L      | Regulatory      | 14            | 4              | 10         | 0.11         | 1             | 0              | 1          | 0.00         | 14            | 6              | 8          | 0.29         | 9.7           | 3.3            | 6.3        | 0.13  |
| UL35  | E        | Matrix/Tegument | 31            | 1              | 30         | 0.00         | 0             | 0              | 0          | No Mutations | 32            | 6              | 25         | 0.03         | 21.0          | 2.3            | 18.3       | 0.01  |
| UL36  | IE       | Matrix/Tegument | 25            | 7              | 18         | 0.11         | 2             | 1              | 1          | 0.34         | 23            | 19             | 4          | 2.33         | 16.7          | 9.0            | 7.7        | 0.93  |
| UL37  | IE       | Regulatory      | 21            | 11             | 10         | 0.37         | 1             | 0              | 1          | 0.00         | 9             | 3              | 6          | 0.14         | 10.3          | 4.7            | 5.7        | 0.17  |
| UL38  | IE       | Unknown         | 10            | 4              | 6          | 0.21         | 0             | 0              | 0          | No Mutations | 4             | 1              | 3          | 0.04         | 4.7           | 1.7            | 3.0        | 0.12  |
| UL40  | E-L      | Regulatory      | 15            | 9              | 6          | 0.56         | 12            | 7              | 5          | 0.49         | 15            | 9              | 6          | 0.59         | 14.0          | 8.3            | 5.7        | 0.55  |
| UL41A | L        | Unknown         | 1             | 0              | 1          | 0.00         | 2             | 1              | 1          | 0.34         | 2             | 1              | 1          | 0.34         | 1.7           | 0.7            | 1.0        | 0.23  |
| UL42  | unk      | Unknown         | 7             | 4              | 3          | 0.49         | 2             | 2              | 0          | Incalculable | 4             | 2              | 2          | 0.34         | 4.3           | 2.7            | 1.7        | 0.41  |
| UL43  | L        | Matrix/Tegument | 17            | 4              | 13         | 0.06         | 19            | 7              | 12         | 0.14         | 13            | 6              | 7          | 0.25         | 16.3          | 5.7            | 10.7       | 0.15  |
| UL44  | E-L      | DNA Replication | 20            | 2              | 18         | 0.03         | 16            | 6              | 9          | 0.16         | 17            | 5              | 12         | 0.09         | 17.7          | 4.3            | 13.0       | 0.09  |
| UL45  | L        | Matrix/Tegument | 37            | 6              | 31         | 0.05         | 17            | 4              | 13         | 0.08         | 40            | 11             | 29         | 0.07         | 31.3          | 7.0            | 24.3       | 0.07  |
| UL47  | E-L      | Matrix/Tegument | 7             | 0              | 7          | 0.00         | 5             | 0              | 5          | 0.00         | 7             | 2              | 5          | 0.09         | 6.3           | 0.7            | 5.7        | 0.03  |
| UL46  | E-L      | capsid          | 42            | 7              | 35         | 0.05         | 31            | 5              | 26         | 0.03         | 36            | 9              | 26         | 0.07         | 36.3          | 7.0            | 29.0       | 0.05  |
| UL48  | L        | capsid          | 97            | 13             | 84         | 0.04         | 99            | 32             | 65         | 0.10         | 80            | 25             | 47         | 0.11         | 92.0          | 23.3           | 65.3       | 0.08  |
| UL48A | unk      | capsid          | 6             | 0              | 6          | 0.00         | 9             | 3              | 6          | 0.10         | 4             | 2              | 2          | 0.33         | 6.3           | 1.7            | 4.7        | 0.14  |
| UL49  | E-L      | capsid          | 23            | 7              | 16         | 0.12         | 13            | 3              | 10         | 0.06         | 11            | 4              | 6          | 0.27         | 15.7          | 4.7            | 10.7       | 0.15  |
| UL50  | unk      | Nuclear Egress  | 10            | 4              | 6          | 0.22         | 6             | 3              | 3          | 0.34         | 14            | 3              | 10         | 0.04         | 10.0          | 3.3            | 6.3        | 0.20  |
| UL51  | unk      | DNA Packaging   | 2             | 1              | 1          | 0.34         | 1             | 0              | 1          | 0.00         | 4             | 1              | 3          | 0.11         | 2.3           | 0.7            | 1.7        | 0.15  |
| UL52  | L        | DNA Packaging   | 15            | 6              | 9          | 0.22         | 14            | 4              | 10         | 0.12         | 33            | 12             | 21         | 0.14         | 20.7          | 7.3            | 13.3       | 0.16  |
| UL53  | E        | Nuclear Egress  | 17            | 8              | 9          | 0.29         | 9             | 2              | 7          | 0.04         | 17            | 7              | 10         | 0.21         | 14.3          | 5.7            | 8.7        | 0.18  |
| UL54  | E        | DNA Replication | 47            | 3              | 44         | 0.02         | 45            | 10             | 35         | 0.04         | 17            | 6              | 11         | 0.17         | 36.3          | 6.3            | 30.0       | 0.07  |
| UL55  | E        | Glycoprotein    | 66            | 11             | 55         | 0.04         | 55            | 20             | 35         | 0.11         | 26            | 9              | 17         | 0.12         | 49.0          | 13.3           | 35.7       | 0.09  |
| UL56  | E        | DNA Packaging   | 29            | 4              | 25         | 0.04         | 31            | 13             | 18         | 0.22         | 16            | 3              | 13         | 0.08         | 25.3          | 6.7            | 18.7       | 0.11  |
| UL57  | E        | DNA Replication | 17            | 0              | 17         | 0.00         | 30            | 7              | 23         | 0.07         | 17            | 4              | 12         | 0.03         | 21.3          | 3.7            | 17.3       | 0.03  |
| UL69  | E-L      | Regulatory      | 18            | 6              | 12         | 0.14         | 10            | 2              | 7          | 0.12         | 10            | 4              | 6          | 0.19         | 12.7          | 4.0            | 8.3        | 0.15  |
| UL70  | E-L      | DNA Replication | 25            | 2              | 23         | 0.03         | 31            | 6              | 25         | 0.06         | 26            | 5              | 21         | 0.07         | 27.3          | 4.3            | 23.0       | 0.05  |
| UL71  | unk      | Unknown         | 11            | 2              | 9          | 0.05         | 12            | 5              | 7          | 0.21         | 6             | 1              | 5          | 0.07         | 9.7           | 2.7            | 7.0        | 0.11  |

|        |      |                 |    |    |    |              |    |    |    |              |    |    |    |              |      |      |      |      |
|--------|------|-----------------|----|----|----|--------------|----|----|----|--------------|----|----|----|--------------|------|------|------|------|
| UL72   | L    | Unknown         | 8  | 0  | 8  | 0.00         | 12 | 5  | 7  | 0.20         | 11 | 2  | 9  | 0.03         | 10.3 | 2.3  | 8.0  | 0.08 |
| UL73   | E-L  | Glycoprotein    | 20 | 6  | 14 | 0.09         | 13 | 1  | 12 | 0.00         | 13 | 2  | 11 | 0.04         | 15.3 | 3.0  | 12.3 | 0.04 |
| UL74   | unk  | Glycoprotein    | 20 | 7  | 13 | 0.17         | 26 | 15 | 11 | 0.63         | 9  | 6  | 3  | 1.86         | 18.3 | 9.3  | 9.0  | 0.89 |
| UL75   | E-L  | Glycoprotein    | 27 | 6  | 21 | 0.08         | 30 | 9  | 20 | 0.10         | 40 | 12 | 28 | 0.08         | 32.3 | 9.0  | 23.0 | 0.09 |
| UL76   | unk  | Regulatory      | 12 | 3  | 9  | 0.07         | 17 | 6  | 10 | 0.12         | 12 | 5  | 7  | 0.21         | 13.7 | 4.7  | 8.7  | 0.13 |
| UL77   | unk  | DNA Packaging   | 32 | 9  | 23 | 0.12         | 23 | 10 | 13 | 0.24         | 17 | 5  | 12 | 0.08         | 24.0 | 8.0  | 16.0 | 0.14 |
| UL78   | E    | Regulatory      | 24 | 8  | 16 | 0.14         | 1  | 0  | 1  | 0.00         | 14 | 2  | 12 | 0.04         | 13.0 | 3.3  | 9.7  | 0.06 |
| UL79   | E-L  | Unknown         | 9  | 2  | 7  | 0.04         | 2  | 1  | 1  | 0.34         | 6  | 1  | 5  | 0.01         | 5.7  | 1.3  | 4.3  | 0.13 |
| UL80   | L    | capsid          | 32 | 10 | 22 | 0.13         | 4  | 1  | 3  | 0.11         | 25 | 7  | 18 | 0.08         | 20.3 | 6.0  | 14.3 | 0.11 |
| UL80.5 | unk  | capsid          | 18 | 5  | 13 | 0.11         | 1  | 0  | 1  | 0.00         | 18 | 4  | 14 | 0.04         | 12.3 | 3.0  | 9.3  | 0.05 |
| UL82   | L    | Matrix/Tegument | 32 | 5  | 27 | 0.03         | 0  | 0  | 0  | No Mutations | 10 | 3  | 7  | 0.12         | 14.0 | 2.7  | 11.3 | 0.07 |
| UL83   | L    | Matrix/Tegument | 21 | 2  | 19 | 0.01         | 1  | 0  | 1  | 0.00         | 18 | 5  | 12 | 0.06         | 13.3 | 2.3  | 10.7 | 0.02 |
| UL84   | E-L  | DNA Replication | 23 | 7  | 16 | 0.10         | 0  | 0  | 0  | No Mutations | 22 | 6  | 15 | 0.07         | 15.0 | 4.3  | 10.3 | 0.09 |
| UL85   | E-L  | capsid          | 9  | 0  | 9  | 0.00         | 0  | 0  | 0  | No Mutations | 6  | 1  | 5  | 0.01         | 5.0  | 0.3  | 4.7  | 0.01 |
| UL86   | E-L  | capsid          | 96 | 8  | 88 | 0.02         | 3  | 0  | 2  | 0.00         | 26 | 4  | 21 | 0.05         | 41.7 | 4.0  | 37.0 | 0.02 |
| UL87   | E-L  | Matrix?         | 50 | 18 | 32 | 0.17         | 12 | 6  | 6  | 0.34         | 16 | 6  | 10 | 0.16         | 26.0 | 10.0 | 16.0 | 0.22 |
| UL88   | unk  | Matrix/Tegument | 13 | 1  | 12 | 0.01         | 5  | 1  | 4  | 0.05         | 11 | 4  | 6  | 0.25         | 9.7  | 2.0  | 7.3  | 0.10 |
| UL91   | L    | Unknown         | 9  | 2  | 7  | 0.10         | 10 | 3  | 7  | 0.15         | 5  | 3  | 2  | 0.52         | 8.0  | 2.7  | 5.3  | 0.25 |
| UL92   | L    | Unknown         | 3  | 1  | 2  | 0.17         | 2  | 1  | 1  | 0.34         | 5  | 0  | 5  | 0.00         | 3.3  | 0.7  | 2.7  | 0.17 |
| UL93   | L    | DNA Packaging   | 5  | 0  | 5  | 0.00         | 5  | 4  | 1  | 4.54         | 8  | 3  | 5  | 0.13         | 6.0  | 2.3  | 3.7  | 1.56 |
| UL94   | L    | Matrix/Tegument | 30 | 7  | 23 | 0.09         | 30 | 12 | 18 | 0.17         | 13 | 5  | 8  | 0.15         | 24.3 | 8.0  | 16.3 | 0.14 |
| UL95   | E-L  | Matrix?         | 20 | 0  | 20 | 0.00         | 19 | 7  | 12 | 0.16         | 7  | 1  | 6  | 0.06         | 15.3 | 2.7  | 12.7 | 0.07 |
| UL89   | E-L  | DNA Packaging   | 21 | 4  | 17 | 0.07         | 20 | 9  | 11 | 0.25         | 12 | 5  | 7  | 0.23         | 17.7 | 6.0  | 11.7 | 0.18 |
| UL96   | E-L  | Matrix/Tegument | 2  | 0  | 2  | 0.00         | 2  | 1  | 1  | 0.34         | 3  | 1  | 2  | 0.08         | 2.3  | 0.7  | 1.7  | 0.14 |
| UL97   | E-L  | Matrix/Tegument | 16 | 2  | 14 | 0.04         | 18 | 6  | 12 | 0.19         | 14 | 5  | 9  | 0.18         | 16.0 | 4.3  | 11.7 | 0.13 |
| UL98   | E-L  | DNA Replication | 13 | 2  | 11 | 0.04         | 12 | 1  | 11 | 0.00         | 8  | 1  | 7  | 0.03         | 11.0 | 1.3  | 9.7  | 0.02 |
| UL99   | L    | Envelope        | 6  | 5  | 1  | 7.38         | 10 | 3  | 7  | 0.09         | 3  | 1  | 2  | 0.08         | 6.3  | 3.0  | 3.3  | 2.52 |
| UL100  | E-L  | Glycoprotein    | 2  | 1  | 1  | 0.34         | 14 | 5  | 7  | 0.34         | 21 | 8  | 13 | 0.15         | 12.3 | 4.7  | 7.0  | 0.28 |
| UL102  | L    | DNA Replication | 2  | 0  | 2  | 0.00         | 29 | 6  | 23 | 0.04         | 32 | 6  | 26 | 0.04         | 21.0 | 4.0  | 17.0 | 0.03 |
| UL103  | L    | Matrix/Tegument | 0  | 0  | 0  | No Mutations | 6  | 2  | 4  | 0.13         | 10 | 2  | 8  | 0.02         | 5.3  | 1.3  | 4.0  | 0.07 |
| UL105  | E    | DNA Replication | 9  | 0  | 9  | 0.00         | 25 | 5  | 20 | 0.04         | 18 | 6  | 12 | 0.13         | 17.3 | 3.7  | 13.7 | 0.05 |
| UL104  | E    | capsid          | 14 | 4  | 10 | 0.13         | 13 | 2  | 11 | 0.07         | 10 | 5  | 5  | 0.45         | 12.3 | 3.7  | 8.7  | 0.22 |
| UL111A | E-L  | Immune Evasion  | 0  | 0  | 0  | No Mutations | 5  | 2  | 3  | 0.19         | 0  | 0  | 0  | No Mutations | 1.7  | 0.7  | 1.0  | 0.19 |
| UL112  | E    | DNA Replication | 5  | 2  | 3  | 0.17         | 25 | 14 | 11 | 0.49         | 3  | 1  | 2  | 0.17         | 11.0 | 5.7  | 5.3  | 0.28 |
| UL114  | E    | DNA Replication | 5  | 0  | 5  | 0.00         | 8  | 2  | 6  | 0.07         | 2  | 0  | 2  | 0.00         | 5.0  | 0.7  | 4.3  | 0.02 |
| UL115  | L    | Glycoprotein    | 8  | 3  | 5  | 0.19         | 7  | 2  | 5  | 0.13         | 0  | 0  | 0  | No Mutations | 5.0  | 1.7  | 3.3  | 0.16 |
| UL116  | E-L  | Unknown         | 5  | 2  | 3  | 0.23         | 14 | 5  | 9  | 0.17         | 2  | 2  | 0  | Incalculable | 7.0  | 3.0  | 4.0  | 0.20 |
| UL117  | L    | Unknown         | 4  | 0  | 4  | 0.00         | 11 | 3  | 8  | 0.05         | 18 | 5  | 13 | 0.08         | 11.0 | 2.7  | 8.3  | 0.04 |
| UL119  | E    | Glycoprotein    | 15 | 3  | 12 | 0.08         | 22 | 13 | 9  | 0.71         | 22 | 15 | 7  | 1.49         | 19.7 | 10.3 | 9.3  | 0.76 |
| UL120  | L    | Unknown         | 5  | 0  | 5  | 0.00         | 17 | 9  | 8  | 0.47         | 5  | 3  | 2  | 0.69         | 9.0  | 4.0  | 5.0  | 0.39 |
| UL121  | L    | Unknown         | 19 | 9  | 10 | 0.28         | 19 | 7  | 12 | 0.15         | 13 | 7  | 6  | 0.43         | 17.0 | 7.7  | 9.3  | 0.29 |
| UL122  | IE-L | Regulatory      | 34 | 9  | 25 | 0.08         | 29 | 17 | 12 | 1.22         | 21 | 16 | 5  | 2.38         | 28.0 | 14.0 | 14.0 | 1.23 |
| UL123  | IE   | Regulatory      | 50 | 16 | 34 | 0.11         | 17 | 8  | 8  | 0.43         | 28 | 18 | 9  | 1.45         | 31.7 | 14.0 | 17.0 | 0.66 |
| UL124  | E    | Unknown         | 11 | 4  | 6  | 0.15         | 9  | 5  | 3  | 1.04         | 7  | 3  | 2  | 1.39         | 9.0  | 4.0  | 3.7  | 0.86 |
| UL128  | E    | Glycoprotein    | 4  | 2  | 2  | 0.34         | 5  | 3  | 2  | 0.51         | 2  | 1  | 1  | 0.34         | 3.7  | 2.0  | 1.7  | 0.39 |
| UL130  | E-L  | Glycoprotein    | 11 | 2  | 9  | 0.07         | 10 | 4  | 6  | 0.17         | 9  | 2  | 7  | 0.09         | 10.0 | 2.7  | 7.3  | 0.11 |
| UL131A | L    | Glycoprotein    | 0  | 0  | 0  | No Mutations | 4  | 0  | 4  | 0.00         | 7  | 1  | 6  | 0.05         | 3.7  | 0.3  | 3.3  | 0.03 |
| UL132  | E-L  | Glycoprotein    | 14 | 10 | 4  | 1.13         | 14 | 6  | 6  | 0.36         | 16 | 12 | 4  | 1.61         | 14.7 | 9.3  | 4.7  | 1.03 |
| UL148  | unk  | Unknown         | 10 | 3  | 7  | 0.12         | 12 | 3  | 8  | 0.09         | 12 | 3  | 9  | 0.06         | 11.3 | 3.0  | 8.0  | 0.09 |
| UL147A | unk  | Unknown         | 10 | 3  | 7  | 0.09         | 5  | 0  | 5  | 0.00         | 8  | 2  | 6  | 0.06         | 7.7  | 1.7  | 6.0  | 0.05 |
| UL147  | E-L  | Regulatory      | 8  | 2  | 6  | 0.08         | 12 | 5  | 7  | 0.26         | 15 | 6  | 9  | 0.18         | 11.7 | 4.3  | 7.3  | 0.17 |
| UL146  | unk  | Regulatory      | 0  | 0  | 0  | No Mutations | 0  | 0  | 0  | No Mutations | 0  | 0  | 0  | No Mutations | 0.0  | 0.0  | 0.0  | --   |
| UL145  | unk  | Unknown         | 10 | 3  | 7  | 0.11         | 6  | 3  | 3  | 0.33         | 10 | 3  | 7  | 0.11         | 8.7  | 3.0  | 5.7  | 0.18 |
| UL144  | unk  | Glycoprotein    | 10 | 2  | 7  | 0.08         | 19 | 5  | 13 | 0.07         | 15 | 6  | 8  | 0.18         | 14.7 | 4.3  | 9.3  | 0.11 |
| UL142  | unk  | Glycoprotein    | 26 | 12 | 14 | 0.26         | 23 | 13 | 10 | 0.51         | 10 | 4  | 6  | 0.19         | 19.7 | 9.7  | 10.0 | 0.32 |
| UL141  | unk  | Glycoprotein    | 32 | 3  | 29 | 0.03         | 29 | 8  | 21 | 0.06         | 14 | 4  | 10 | 0.07         | 25.0 | 5.0  | 20.0 | 0.05 |
| UL140  | unk  | Unknown         | 3  | 2  | 1  | 0.69         | 12 | 3  | 8  | 0.07         | 11 | 2  | 9  | 0.04         | 8.7  | 2.3  | 6.0  | 0.27 |
| UL139  | unk  | Glycoprotein    | 2  | 0  | 2  | 0.00         | 4  | 1  | 3  | 0.04         | 9  | 4  | 3  | 0.53         | 5.0  | 1.7  | 2.7  | 0.19 |
| UL138  | unk  | Regulatory      | 4  | 1  | 3  | 0.11         | 13 | 1  | 12 | 0.00         | 8  | 0  | 8  | 0.00         | 8.3  | 0.7  | 7.7  | 0.04 |
| UL136  | unk  | Unknown         | 0  | 0  | 0  | No Mutations | 8  | 0  | 5  | 0.00         | 13 | 3  | 8  | 0.08         | 7.0  | 1.0  | 4.3  | 0.04 |
| UL135  | unk  | Unknown         | 3  | 0  | 3  | 0.00         | 5  | 2  | 3  | 0.23         | 19 | 6  | 13 | 0.08         | 9.0  | 2.7  | 6.3  | 0.10 |
| UL133  | unk  | Unknown         | 0  | 0  | 0  | No Mutations | 24 | 7  | 17 | 0.10         | 23 | 9  | 14 | 0.18         | 15.7 | 5.3  | 10.3 | 0.14 |
| UL148A | unk  | Unknown         | 8  | 1  | 7  | 0.02         | 8  | 0  | 8  | 0.00         | 3  | 0  | 3  | 0.00         | 6.3  | 0.3  | 6.0  | 0.01 |
| UL148B | unk  | Unknown         | 4  | 1  | 3  | 0.10         | 3  | 1  | 2  | 0.08         | 4  | 1  | 3  | 0.10         | 3.7  | 1.0  | 2.7  | 0.10 |
| UL148C | unk  | Unknown         | 7  | 0  | 7  | 0.00         | 2  | 1  | 1  | 0.34         | 0  | 0  | 0  | No Mutations | 3.0  | 0.3  | 2.7  | 0.17 |
| UL148D | unk  | Unknown         | 7  | 3  | 4  | 0.22         | 6  | 4  | 2  | 1.04         | 3  | 2  | 1  | 0.68         | 5.3  | 3.0  | 2.3  | 0.65 |
| UL150  | unk  | Unknown         | 96 | 51 | 45 | 0.36         | 65 | 33 | 31 | 0.36         | 47 | 24 | 22 | 0.36         | 69.3 | 36.0 | 32.7 | 0.36 |
| IRS1   | IE   | Regulatory      | 22 | 5  | 17 | 0.10         | 14 | 5  | 9  | 0.15         | 13 | 7  | 6  | 0.51         | 16.3 | 5.7  | 10.7 | 0.25 |
| US1    | unk  | Unknown         | 6  | 2  | 4  | 0.16         | 2  | 2  | 0  | Incalculable | 4  | 2  | 2  | 0.34         | 4.0  | 2.0  | 2.0  | 0.25 |

|       |     |                 |    |    |    |              |    |    |    |              |    |    |    |              |      |     |      |      |
|-------|-----|-----------------|----|----|----|--------------|----|----|----|--------------|----|----|----|--------------|------|-----|------|------|
| US2   | E   | Immune Evasion  | 4  | 1  | 3  | 0.17         | 7  | 3  | 4  | 0.34         | 4  | 3  | 1  | 1.18         | 5.0  | 2.3 | 2.7  | 0.56 |
| US3   | IE  | Immune Evasion  | 15 | 10 | 5  | 0.97         | 12 | 6  | 6  | 0.40         | 0  | 0  | 0  | No Mutations | 9.0  | 5.3 | 3.7  | 0.68 |
| US6   | E-L | Immune Evasion  | 8  | 5  | 3  | 0.76         | 9  | 3  | 6  | 0.14         | 1  | 0  | 1  | 0.00         | 6.0  | 2.7 | 3.3  | 0.30 |
| US7   | E-L | Immune Evasion  | 22 | 7  | 15 | 0.12         | 2  | 2  | 0  | Incalculable | 27 | 17 | 9  | 1.24         | 17.0 | 8.7 | 8.0  | 0.68 |
| US8   | E   | Immune Evasion  | 5  | 4  | 1  | 2.44         | 10 | 2  | 7  | 0.04         | 5  | 1  | 4  | 0.08         | 6.7  | 2.3 | 4.0  | 0.85 |
| US9   | E   | Immune Evasion  | 10 | 2  | 8  | 0.08         | 10 | 3  | 7  | 0.10         | 6  | 3  | 3  | 0.34         | 8.7  | 2.7 | 6.0  | 0.17 |
| US10  | E   | Immune Evasion  | 15 | 1  | 14 | 0.02         | 16 | 6  | 9  | 0.15         | 14 | 6  | 8  | 0.21         | 15.0 | 4.3 | 10.3 | 0.13 |
| US11  | E   | Immune Evasion  | 6  | 2  | 4  | 0.13         | 7  | 4  | 3  | 0.60         | 5  | 3  | 2  | 0.69         | 6.0  | 3.0 | 3.0  | 0.47 |
| US12  | E   | Unknown         | 8  | 1  | 7  | 0.05         | 9  | 4  | 5  | 0.22         | 10 | 2  | 8  | 0.05         | 9.0  | 2.3 | 6.7  | 0.10 |
| US13  | E   | Unknown         | 2  | 0  | 2  | 0.00         | 3  | 0  | 3  | 0.00         | 2  | 1  | 1  | 0.34         | 2.3  | 0.3 | 2.0  | 0.11 |
| US14  | E   | Unknown         | 28 | 5  | 23 | 0.05         | 28 | 12 | 16 | 0.21         | 24 | 11 | 13 | 0.26         | 26.7 | 9.3 | 17.3 | 0.17 |
| US15  | E-L | Unknown         | 3  | 1  | 2  | 0.11         | 5  | 2  | 3  | 0.19         | 5  | 2  | 3  | 0.19         | 4.3  | 1.7 | 2.7  | 0.16 |
| US16  | E   | Unknown         | 5  | 2  | 3  | 0.23         | 7  | 4  | 3  | 0.49         | 6  | 4  | 1  | 4.53         | 6.0  | 3.3 | 2.3  | 1.75 |
| US17  | E   | Unknown         | 17 | 5  | 12 | 0.12         | 1  | 0  | 1  | 0.00         | 7  | 3  | 4  | 0.19         | 8.3  | 2.7 | 5.7  | 0.10 |
| US18  | E   | Unknown         | 11 | 0  | 11 | 0.00         | 4  | 2  | 2  | 0.34         | 10 | 3  | 7  | 0.06         | 8.3  | 1.7 | 6.7  | 0.13 |
| US19  | E   | Unknown         | 1  | 1  | 0  | Incalculable | 2  | 1  | 1  | 0.34         | 7  | 5  | 2  | 1.84         | 3.3  | 2.3 | 1.0  | 1.09 |
| US20  | E   | Unknown         | 3  | 1  | 2  | 0.17         | 0  | 0  | 0  | No Mutations | 14 | 2  | 12 | 0.03         | 5.7  | 1.0 | 4.7  | 0.10 |
| US21  | unk | Unknown         | 9  | 0  | 9  | 0.00         | 5  | 3  | 2  | 0.69         | 9  | 5  | 4  | 0.51         | 7.7  | 2.7 | 5.0  | 0.40 |
| US22  | E   | Matrix/Tegument | 25 | 4  | 21 | 0.05         | 14 | 7  | 5  | 1.21         | 14 | 6  | 8  | 0.26         | 17.7 | 5.7 | 11.3 | 0.50 |
| US23  | E   | Matrix/Tegument | 29 | 3  | 26 | 0.01         | 40 | 10 | 29 | 0.06         | 40 | 6  | 34 | 0.01         | 36.3 | 6.3 | 29.7 | 0.03 |
| US24  | E   | Matrix/Tegument | 13 | 0  | 13 | 0.00         | 11 | 1  | 10 | 0.01         | 13 | 3  | 9  | 0.05         | 12.3 | 1.3 | 10.7 | 0.02 |
| US26  | E   | Unknown         | 6  | 3  | 3  | 0.34         | 5  | 2  | 3  | 0.23         | 15 | 4  | 11 | 0.09         | 8.7  | 3.0 | 5.7  | 0.22 |
| US27  | E   | Glycoprotein    | 11 | 5  | 6  | 0.26         | 1  | 1  | 0  | Incalculable | 12 | 7  | 5  | 0.72         | 8.0  | 4.3 | 3.7  | 0.49 |
| US28  | E   | Envelope        | 13 | 3  | 10 | 0.10         | 1  | 0  | 1  | 0.00         | 19 | 6  | 13 | 0.13         | 11.0 | 3.0 | 8.0  | 0.08 |
| US29  | E-L | Unknown         | 15 | 5  | 10 | 0.15         | 2  | 0  | 2  | 0.00         | 20 | 6  | 14 | 0.10         | 12.3 | 3.7 | 8.7  | 0.08 |
| US30  | E   | Unknown         | 24 | 10 | 14 | 0.21         | 0  | 0  | 0  | No Mutations | 16 | 2  | 14 | 0.04         | 13.3 | 4.0 | 9.3  | 0.13 |
| US31  | unk | Unknown         | 3  | 0  | 3  | 0.00         | 0  | 0  | 0  | No Mutations | 5  | 0  | 5  | 0.00         | 2.7  | 0.0 | 2.7  | 0.00 |
| US32  | L   | Unknown         | 6  | 1  | 5  | 0.06         | 0  | 0  | 0  | No Mutations | 5  | 2  | 3  | 0.19         | 3.7  | 1.0 | 2.7  | 0.13 |
| US34  | E   | Unknown         | 12 | 8  | 4  | 0.77         | 0  | 0  | 0  | No Mutations | 15 | 10 | 5  | 0.93         | 9.0  | 6.0 | 3.0  | 0.85 |
| US34A | unk | Unknown         | 3  | 1  | 2  | 0.16         | 0  | 0  | 0  | No Mutations | 7  | 5  | 2  | 4.14         | 3.3  | 2.0 | 1.3  | 2.15 |
| TRS1  | IE  | Regulatory      | 22 | 3  | 19 | 0.03         | 23 | 5  | 17 | 0.06         | 23 | 6  | 17 | 0.08         | 22.7 | 4.7 | 17.7 | 0.06 |
